# Supplementary material for: Reversible formation of networked porous Sb nanoparticles during cycling: Sb nanoparticles encapsulated in a nitrogen-doped carbon matrix with nanorod structures for high-performance Li-ion batteries
Source: Royal Society of Chemistry journal article supplement (doi:10.1039/c9ta09093b), 2019-01-01
Supplement: c9ta09093b1.pdf [file c9ta09093b1.pdf]

## Supporting Information

### **Reversible Networked Porous Formation in Sb Nanoparticles during Cycles: Sb Nanoparticles Encapsulated into Nitrogen-Doped Carbon Matrix with Nanorods Structure for High-Performance Li-ion Batteries**

Ping Feng,<sup>a</sup> Zhe Cui,<sup>a</sup> Shu-Ang He,<sup>a</sup> Qian Liu,<sup>b</sup> Jingqi Zhu,<sup>a</sup> Chaoting Xu,<sup>a</sup> Rujia Zou\*<sup>a</sup> and Junqing Hu<sup>a,c</sup>

<sup>a</sup> State Key Laboratory for Modification of Chemical Fibers and Polymer Materials,  
College of Materials Science and Engineering, Donghua University, Shanghai 201620,  
China. E-mail: rjzou@dhu.edu.cn

<sup>b</sup> College of Science, Donghua University, Shanghai 201620, China

<sup>c</sup> College of Health Science and Environmental Engineering, Shenzhen Technology  
University, Shenzhen 518118, China

## **I. Experimental section**

### **1.1 Synthesis of SbPO<sub>4</sub> nanorods**

SbPO<sub>4</sub> nanorods as the sacrificial template were initially synthesized through a hydrothermal reaction. Typically, 0.228 g of SbCl<sub>3</sub>, 0.345g of NH<sub>4</sub>H<sub>2</sub>PO<sub>4</sub> were dissolved into 40 ml of ethylene glycol at room temperature. This dispersion was heated to 70 °C and transferred to a Teflon-lined stainless autoclave at 160 °C for 4 h in an electric oven. After being cooled to room temperature naturally, the precipitate was collected and washed with deionized water and ethanol several times by centrifugation, then dried at 60 °C overnight to obtain SbPO<sub>4</sub> nanorods.

## **1.2 Synthesis of hollow $\text{Sb}_2\text{O}_5$ nanorods**

To prepare  $\text{Sb}_2\text{O}_5$  nanorods, 100 mg of the prepared  $\text{SbPO}_4$  nanorods and 165mg  $\text{KMnO}_4$  were added to 30 ml of deionized water under ultrasonication for 20 min. After the suspension was placed into a 100 ml flask and maintained at 75 °C for 12 h. After being cooled to room temperature naturally, the precipitate was collected and washed with deionized water and ethanol several times by centrifugation, then dried at 60 °C overnight to obtain hollow  $\text{Sb}_2\text{O}_5$  nanorods.

## **1.3 Synthesis of $\text{Sb@N-MC}$ nanorod**

In a typical synthesis, 50 mg of  $\text{Sb}_2\text{O}_5$  powder was dispersed in 50 ml Tris-buffer solution (10 mM, pH =8.5) and sonicated for 30 min. To coat a polydopamine shell, 50 mg of dopamine hydrochloride was added in the solution and stirred for 2 h. The resultant brownish black solution was washed with DI water and ethanol for several times and then dried under vacuum overnight. The obtained dark brown powder was put into a tube furnace and annealed at 500 °C under  $\text{Ar}/\text{H}_2$  atmosphere for 4 h with a heating rate of 2 °C min. After being cooled to room temperature naturally,  $\text{Sb@N-MC}$  nanorod was obtained.

## **1.4 Synthesis Sb nanoparticles**

Sb nanoparticles were synthesized by a wet chemical method. 0.45 g of  $\text{NaBH}_4$  was dissolved in 13 mL of NMP in a three-necked flask under argon protection and heated to 60 °C. Subsequently, 0.68 g of  $\text{SbCl}_3$  dissolved in 2 mL of NMP was immediately injected

via a syringe. The reaction mixture swiftly turned black and was cooled down quickly using an ice water bath. After cooling down to room temperature, the resultant Sb nanoparticles were collected by centrifugation, washed with deionized water several times, and dried at 40 °C overnight.

### **1.5 Synthesis SbNP@C nanoparticles**

Synthesis of Sb@C nanoparticles. 0.1g Sb nanoparticles were dispersed in 75ml ethanol/water solution (v/v 1:2), and then 0.25g 3-aminophenol, 0.075g hexadecyl trimethyl ammonium Bromide, 0.25ml formaldehyde solution, were added to start the reaction with 0.1ml ammonia aqueous solution as catalyst. The reacting solution was stirred continuously at room temperature for 30 min. And then, the resultant Sb@RF nanoparticles were collected by centrifugation, washed with deionized water several times, and dried at 40 °C overnight. Finally, the obtained Sb@RF powder was put into a tube furnace and annealed at 500 °C under Ar/H<sub>2</sub> atmosphere for 4 h with a heating rate of 2 °C min. After being cooled to room temperature naturally, SbNP@C nanoparticles was obtained.

## II. The thermogravimetric analysis of carbon content for Sb@N-CM nanorods

In order to ascertain carbon content for Sb-C composite materials, the thermogravimetric analysis (TGA) measurement has been conducted in air. As can be seen from Fig. 6, the slight weight loss for SbNP, Sb@N-CM nanorods, and SbNP@C is attributed to the adsorption of water below 300 °C. The weight gain of SbNP between 300~500 °C is due to the slightly oxidation of Sb to Sb<sub>2</sub>O<sub>3</sub> ( $4\text{Sb} + 3\text{O}_2 = 2\text{Sb}_2\text{O}_3$ ). However, the huge weight loss for Sb@N-CM nanorods, and SbNP@C is mainly attributed to the combustion of carbon to CO<sub>2</sub> and oxidation of Sb into Sb<sub>2</sub>O<sub>3</sub>. And then, the weight remains no change until 500 °C, indicating the entirely oxidation of the combustion of carbon to CO<sub>2</sub> and oxidation of Sb into Sb<sub>2</sub>O<sub>3</sub> for different samples. Finally, the carbon content of Sb@N-CM nanorods, and SbNP@C sample is calculated to ~33 and ~59%, respectively.

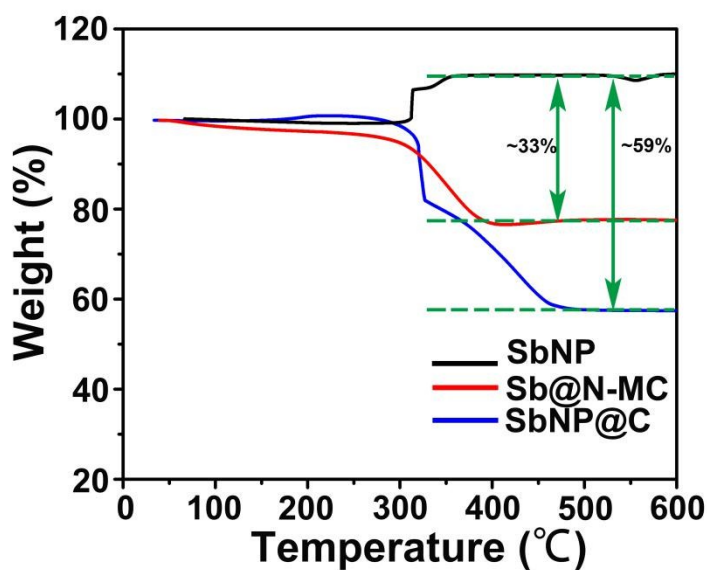

**Fig. S1.** TGA curves of SbNP, Sb@N-CM nanorods, and SbNP@C, respectively.

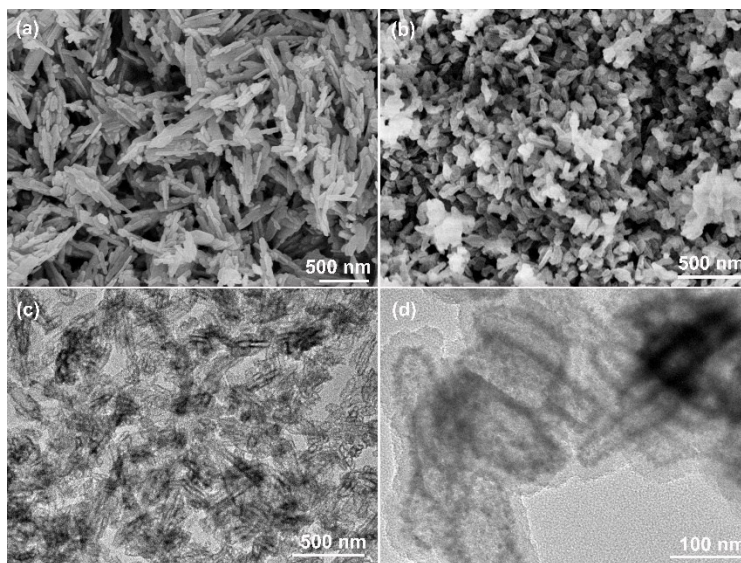

**Fig. S2** (a) SEM image of  $\text{SbPO}_4$  nanorods. (b, c) SEM and TEM image of porous  $\text{Sb}_2\text{O}_5$  hollow nanorods. (d) TEM image of hollow  $\text{PDA}@ \text{Sb}_2\text{O}_5 @ \text{PDA}$  nanorods.

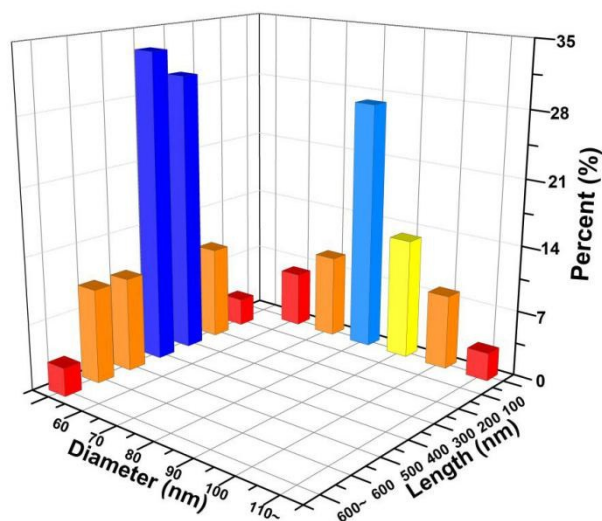

**Fig. S3.** The average diameter and length distribution of the  $\text{Sb}@ \text{N-CM}$  nanorods.

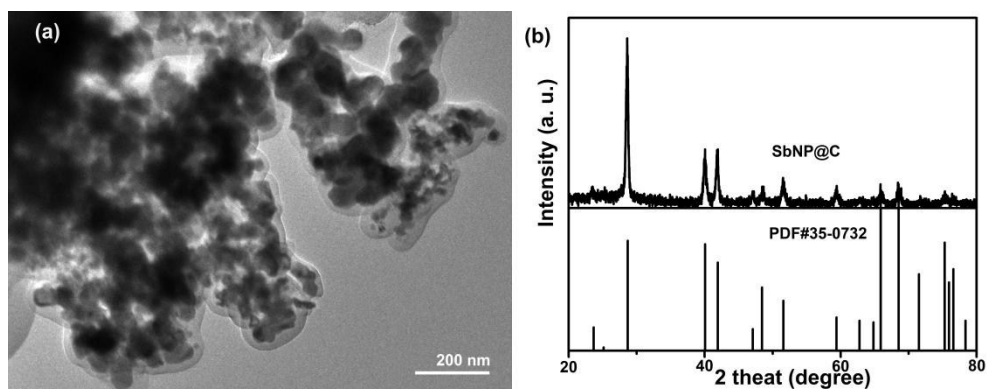

**Fig. S4** (a) TEM image of the Sb@C nanoparticles. (b) XRD pattern of the Sb@C nanoparticles.

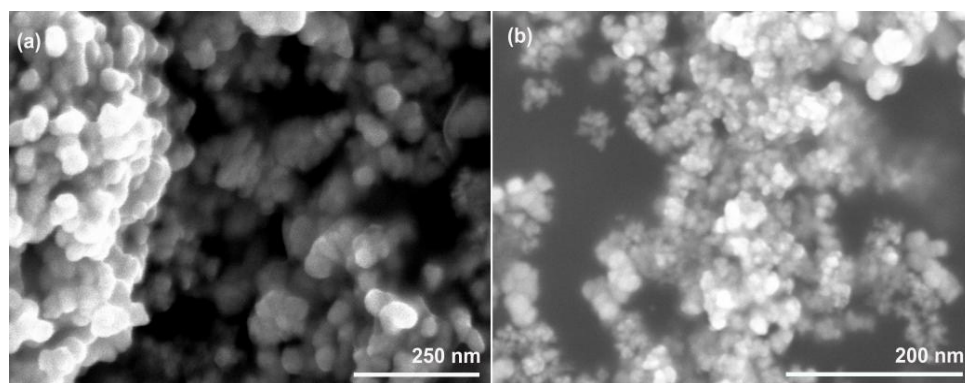

**Fig. S5** (a, b) SEM images of the Sb nanoparticles.

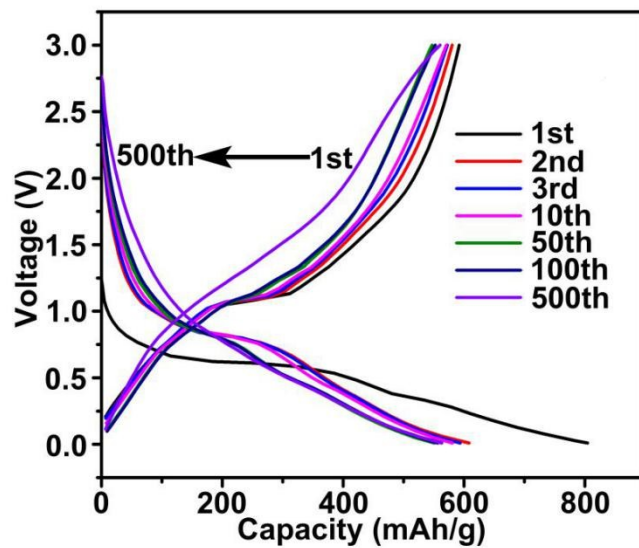

**Fig. S6.** The galvanostatic charge and discharge profiles of Sb@N-CM nanorods at a current density of  $1000 \text{ mA g}^{-1}$  for different cycles.

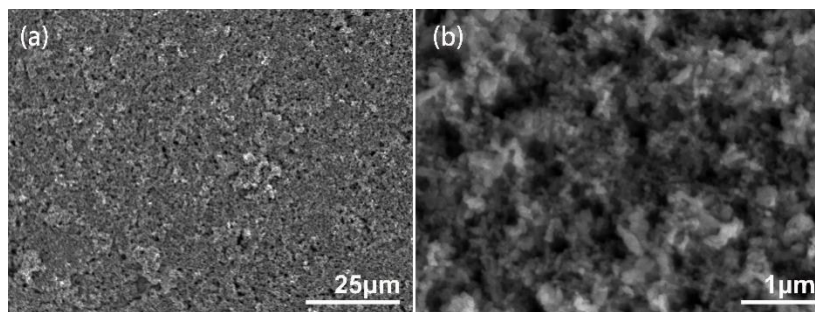

**Fig. 7** (a, b) the SEM images of the Sb@N-CM nanorods electrode before cycle.

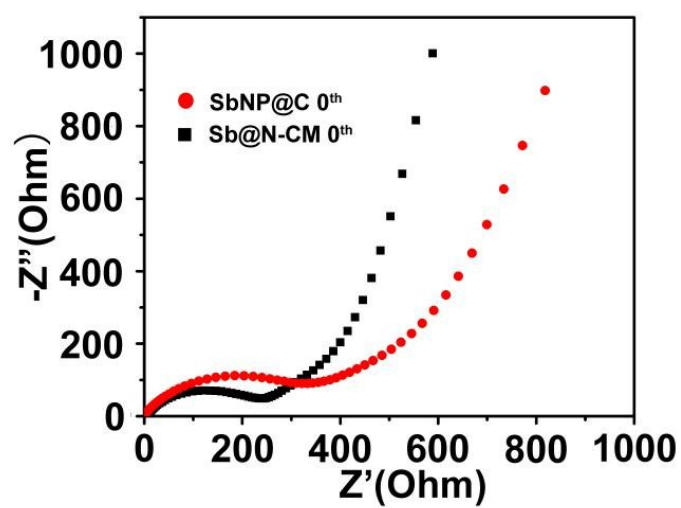

**Fig. S8.** The electrochemical impedance spectra of Sb@N-CM nanorods electrode and Sb@C nanoparticles electrode before cycles.

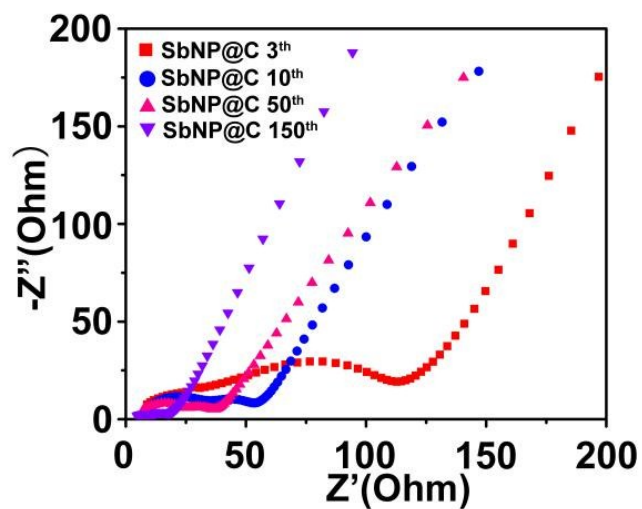

**Fig. S9.** The electrochemical impedance spectra of Sb@C nanoparticles electrode after different cycles.



**Table S1.** Comparison of the cycle performances of Sb@N-MC nanorod electrode with other Sb-based anode materials reported in the literature.

| Electrodes                         | Current density<br>(mA g <sup>-1</sup> ) | Cycle number | Reversible capacity<br>(mA h g <sup>-1</sup> ) | Reversible capacity<br>(mA h g <sup>-1</sup> ) | capacity retention<br>(%) | Ref.      |
|------------------------------------|------------------------------------------|--------------|------------------------------------------------|------------------------------------------------|---------------------------|-----------|
| Sb@N-MC nanorod                    | 200                                      | 190          | 706.8                                          | 695.6                                          | 100.3                     | This work |
|                                    | 1000                                     | 500          | 593.5                                          | 591.8                                          | 99.7                      |           |
| hollow Sb@C yolk-shell spheres     | 50                                       | 100          | 680                                            | 525                                            | 77.2                      | 13        |
|                                    | 1000                                     | 300          |                                                | 405                                            |                           |           |
| Sb@TiO <sub>2-x</sub> nanotubes    | 660                                      | 1000         |                                                | 547                                            |                           | 20        |
|                                    | 3300                                     | 1000         |                                                | 445                                            |                           |           |
|                                    | 6600                                     | 1000         |                                                | 424                                            |                           |           |
| Sb@N-C                             | 200                                      | 300          | 650.8                                          | 602.8                                          | 92.7                      | 21        |
|                                    | 2000                                     | 3000         | 467.6                                          | 395                                            | 84.5                      |           |
| monodisperse Sb nanocrystals       | 330                                      | 100          | 600                                            |                                                |                           | 15        |
|                                    | 2640                                     | 100          |                                                |                                                |                           |           |
| antimony/amorphous carbon/graphene | 500                                      | 400          | 665.4                                          | 592                                            | 88.9                      | 19        |
|                                    | 1000                                     | 700          |                                                | 413                                            |                           |           |
| SiO <sub>2</sub> /Sb@CNF           | 500                                      | 400          |                                                | 572                                            |                           | 14        |
|                                    | 1000                                     | 400          |                                                | 468                                            |                           |           |
| C/Sb composites                    | 100                                      | 200          | 595.5                                          | 466.2                                          | 78.3                      | 25        |
| G@NiSb/Sb@NF                       | 200                                      | 50           |                                                | 340                                            |                           | 18        |
| ball milled Sb-carbon              | 230                                      | 250          | 612                                            | 550                                            | 89.8                      | 29        |

|                 |      |     |       |       |      |    |
|-----------------|------|-----|-------|-------|------|----|
| Sb/NPC          | 200  | 100 |       | 556   |      | 30 |
| rod-like Sb-C   | 100  | 100 | 687.1 | 478.8 | 69.7 | 31 |
| Sb/graphene     | 100  | 40  |       | 411   |      | 32 |
|                 | 400  | 40  |       | 250   |      |    |
| RGO-SbTF-Ni     | 100  | 50  | 576.1 | 424.1 | 73.6 | 33 |
| Sb/C composite  | 200  | 100 | 617   | 565   | 91.5 | 34 |
|                 | 1000 | 500 |       | 400.5 |      |    |
| Sb/carbon fiber | 100  | 100 | 680   | 315.9 | 46.5 | 35 |

## References

- 13 J. Liu, L. Yu, C. Wu, Y. Wen, K. Yin, F. K. Chiang, R. Hu, J. Liu, L. Sun, L. Gu, J. Maier, Y. Yu and M. Zhu, *Nano Lett.*, 2017, **17**, 2034-2042.
- 20 N. N. Wang, Z. C. Bai, Y. T. Qian and J. Yang, *Adv. Mater.*, 2016, **28**, 4126-4133.
- 21 W. Luo, F. Li, J. J. Gaumet, P. Magri, S. Diliberto, L. Zhou and L. Q. Mai, *Adv. Energy Mater.*, 2018, **8**, 1703237.
- 15 M. He, K. Kravchyk, M. Walter and M. V. Kovalenko, *Nano Lett.*, 2014, **14**, 1255-1262.
- 19 Z. Z. Wang, J. Qu, S. M. Hao, Y. J. Zhang, F. Q. Kong and Z. Z. Yu, *ChemElectroChem*, 2018, **5**, 2653-2659.
- 14 H. K. Wang, X. M. Yang, Q. Z. Wu, Q. B. Zhang, H. X. Chen, H. M. Jing, J. K. Wang, S. B. Mi, A. L. Rogach and C. M. Niu, *ACS Nano*, 2018, **12**, 3406-3416.
- 25 Y. Cheng, Z. Yi, C. L. Wang, L. D. Wang, Y. M. Wu and L. M. Wang, *Chem. Asian J.*, 2016, **11**, 2173-2180.

- 18 Y. L. Ding, C. Wu, P. Kopold, P. A. van Aken, J. Maier and Y. Yu, *Small*, 2015, **11**, 6026-6035.
- 29 T. Ramireddy, M. M. Rahman, T. Xing, Y. Chen and A. M. Glushenkov, *J. Mater. Chem. A*, 2014, **2**, 4282-4291.
- 30 Q. Yang, J. Zhou, G. Zhang, C. Guo, M. Li, Y. Zhu and Y. Qian, *J. Mater. Chem. A*, 2017, **5**, 12144-12148.
- 31 L. Fan, J. J. Zhang, J. H. Cui, Y. C. Zhu, J. W. Liang, L. L. Wan and Y. T. Qian, *J. Mater. Chem. A*, 2015, **3**, 3276-3280.
- 32 Y. D. Zhang, J. Xie, T. J. Zhu, G. S. Cao, X. B. Zhao and S. C. Zhang, *J. Power Sources*, 2014, **247**, 204-212.
- 33 Z. Yi, Q. G. Han, Y. Cheng, F. X. Wang, Y. M. Wu and L. M. Wang, *Electrochim. Acta*, 2016, **190**, 804-810.
- 34 Z. Yi, Q. Han, P. Zan, Y. Wu, Y. Cheng and L. Wang, *J. Power Sources*, 2016, **331**, 16-21.
- 35 H. Lv, S. Qiu, G. Lu, Y. Fu, X. Li, C. Hu and J. Liu, *Electrochim. Acta*, 2015, **151**, 214-221.
